# Supplementary material for: Predicting the morphology of sickle red blood cells using coarse-grained models of intracellular aligned hemoglobin polymers
Source: Royal Society of Chemistry journal article supplement (doi:10.1039/c2sm07294g), 2012-01-01
Supplement: c2sm07294g.pdf [file c2sm07294g.pdf]

## Supplementary Material: Predicting the morpholog of sickle red blood cells using coarse-grained models of intracellular aligned hemoglobin polymers, by Lei and Karniadakis

### Mathematical description of Sickle RBC shapes

The objective of the material presented herein is to allow interested readers to be able to repeat our results. To quantify the various types of SS-RBC discussed in the current work, we use a polynomial function  $z = f(x, y)$  to fit the surface of the cell membrane for all the three types of cells, similar to the approach in Ref. [1]. The polynomial function is defined by

$$f(x, y) = \alpha_0 + \alpha_1 x^2 + \alpha_2 y^2 + \alpha_3 x^4 + \alpha_4 y^4 + \alpha_5 x^2 y^2, \quad (\text{S1})$$

where  $\alpha_0, \alpha_1, \dots, \alpha_5$  are fitting coefficients determined by the specific shape of the cell. The boundary of the cell on the x-y plane is defined by  $g(x, y) = 0$ , which varies for different types of cell morphology as discussed below.

Moreover, to quantify the difference between the fitting surface and the discrete cell vertices, we define the  $L_2$  error of the fitting normalized by the average thickness of SS-RBC, as

$$\varepsilon = \frac{1}{N_v} \sqrt{\sum_{i=1}^{N_v} (f(x_i, y_i) - z_i)^2} / \langle z \rangle, \quad (\text{S2})$$

where  $x_i, y_i$  and  $z_i$  are the coordinates of a discrete cell vertex,  $N_v$  is the total number of vertices considered, and  $\langle z \rangle$  is the average thickness of SS-RBC.

For each cell, the membrane is divided into two parts according to the dual values in z direction; each part is fitted by Eq. (1) separately as shown in Fig. S1. The combined surfaces define the cell membrane for the classical “elongate” and “sickle” shape of cell as shown in Fig. S1 and Fig. S2. For both “elongated” and “sickle” shape of SS-RBC, the 2D projection on the x-y plane is defined by

$$(x/b_1)^p + (y/b_2)^p = 1, \quad (\text{S3})$$

where  $b_1, b_2$  and  $p$  vary for individual cells with different membrane distortion. The fitting parameters and the final  $L_2$  error for the elongated and sickle shape of the cell morphology are presented from Tab. S1 to Tab. S4.

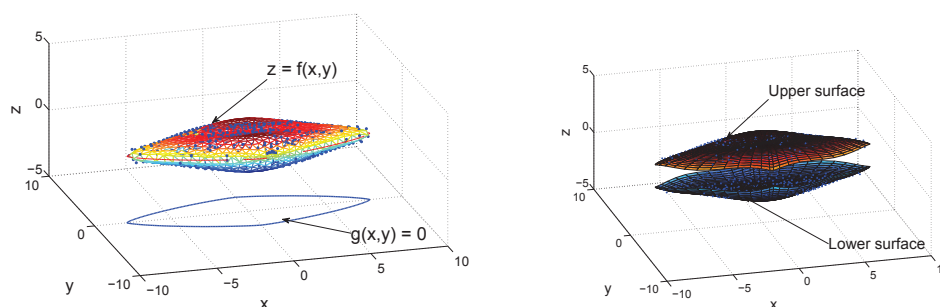

Figure S1: Left: Three-dimensional fitted surface for the simulated SS-RBC of “elongated” shape represented by Eq. (1), where the shear modulus of the cell membrane is  $20\mu_0$ , where  $\mu_0$

is the shear modulus of the healthy RBC. The blue dots represent the cell vertices obtained from the model described in the current work. The blue curve represents the boundary of the cell membrane on the x-y plane fitted by Eq. (3). Right: Fitted surfaces with the upper and lower part shifted by 1 and  $-1$  in the z direction for illustration purposes.

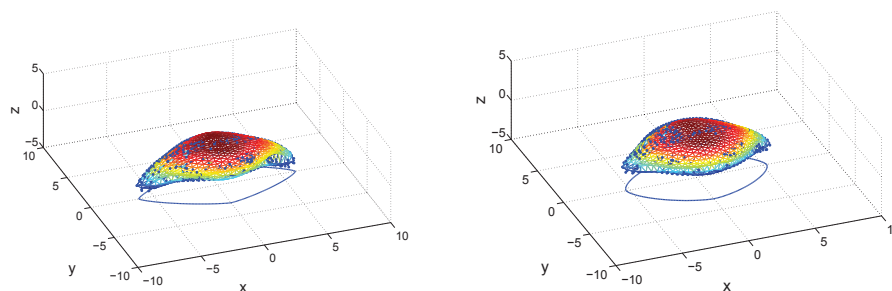

Figure S2: Three-dimensional fitted surface for the simulated SS-RBC of “sickle” shape represented by Eq. (1), where the shear modulus of the cell membrane is  $20\mu_0$  (left) and  $80\mu_0$  (right). The spontaneous angle  $\theta_0$  is  $178.5^\circ$ . The blue curve represents the boundary of the cell membrane on the x-y plane fitted by Eq. (3).

| $\mu/\mu_0$ | $\alpha_0$ | $\alpha_1$             | $\alpha_2$ | $\alpha_3$             | $\alpha_4$             | $\alpha_5$             | $\varepsilon$ |
|-------------|------------|------------------------|------------|------------------------|------------------------|------------------------|---------------|
| 20          | -0.869     | $-2.72 \times 10^{-3}$ | -0.324     | $2.43 \times 10^{-4}$  | $5.65 \times 10^{-2}$  | $2.11 \times 10^{-2}$  | 0.052         |
| 20          | 1.01       | $-1.46 \times 10^{-3}$ | 0.242      | $-2.07 \times 10^{-4}$ | $-4.70 \times 10^{-2}$ | $-1.91 \times 10^{-2}$ | 0.052         |
| 30          | -0.678     | $-1.40 \times 10^{-2}$ | -0.449     | $4.93 \times 10^{-4}$  | $6.10 \times 10^{-2}$  | $2.51 \times 10^{-2}$  | 0.056         |
| 30          | 0.83       | $7.13 \times 10^{-3}$  | 0.348      | $-4.03 \times 10^{-4}$ | $-5.15 \times 10^{-2}$ | $-2.27 \times 10^{-2}$ | 0.056         |
| 40          | -0.594     | $-2.10 \times 10^{-2}$ | -0.474     | $7.20 \times 10^{-4}$  | $5.77 \times 10^{-2}$  | $2.68 \times 10^{-2}$  | 0.061         |
| 40          | 0.742      | $-1.48 \times 10^{-2}$ | 0.38       | $-6.37 \times 10^{-4}$ | $-5.10 \times 10^{-2}$ | $-2.49 \times 10^{-2}$ | 0.061         |
| 50          | -0.567     | $-2.44 \times 10^{-2}$ | -0.481     | $8.64 \times 10^{-4}$  | $5.56 \times 10^{-2}$  | $2.75 \times 10^{-2}$  | 0.060         |
| 50          | 0.689      | $1.93 \times 10^{-2}$  | 0.405      | $-7.99 \times 10^{-4}$ | $-4.94 \times 10^{-2}$ | $-2.59 \times 10^{-2}$ | 0.060         |
| 60          | -0.574     | $-2.85 \times 10^{-2}$ | -0.455     | $1.09 \times 10^{-3}$  | $4.94 \times 10^{-2}$  | $2.77 \times 10^{-2}$  | 0.073         |
| 60          | 0.627      | $2.51 \times 10^{-2}$  | 0.408      | $-1.04 \times 10^{-3}$ | $-4.59 \times 10^{-2}$ | $-2.64 \times 10^{-2}$ | 0.073         |
| 70          | -0.558     | $-3.14 \times 10^{-2}$ | -0.437     | $1.27 \times 10^{-3}$  | $4.56 \times 10^{-2}$  | $2.77 \times 10^{-2}$  | 0.064         |
| 70          | 0.612      | $2.90 \times 10^{-2}$  | 0.4084     | $-1.22 \times 10^{-3}$ | $-4.37 \times 10^{-2}$ | $-2.67 \times 10^{-2}$ | 0.064         |
| 80          | -0.570     | $-3.16 \times 10^{-2}$ | -0.437     | $1.30 \times 10^{-3}$  | $4.56 \times 10^{-2}$  | $2.79 \times 10^{-2}$  | 0.058         |
| 80          | 0.589      | $2.98 \times 10^{-2}$  | 0.416      | $-1.26 \times 10^{-3}$ | $-4.43 \times 10^{-2}$ | $-2.71 \times 10^{-2}$ | 0.058         |

Table S1: Fitting parameters for the “elongated” shape of SS-RBCs obtained from the simulation with different cell rigidity;  $\mu_0$  and  $\mu$  represent the shear modulus of the healthy cells and SS-RBCs, respectively. For each case of cell rigidity, the two rows of parameters represent the lower and upper part of the fitted cell membrane surface respectively. The unit of  $x$ ,  $y$  and  $z$  in Eq. (1) is in micrometers.

| $\mu/\mu_0$ | $b_1$ | $b_2$ | $p$  |
|-------------|-------|-------|------|
| 20          | 7.9   | 2.8   | 1.33 |
| 30          | 7.15  | 2.95  | 1.40 |
| 40          | 6.7   | 3.05  | 1.45 |
| 50          | 6.4   | 3.1   | 1.5  |
| 60          | 6.1   | 3.19  | 1.55 |
| 70          | 5.85  | 3.25  | 1.58 |
| 80          | 5.8   | 3.29  | 1.60 |

Table S2: Parameters of Eq. (3) for the range of “elongated” shape of SS-RBC on the x-y plane, where the boundary of the cell membrane is defined by a pseudo-elliptical curve.

| $\theta_0$ | $\mu/\mu_0$ | $\alpha_0$ | $\alpha_1$ | $\alpha_2$ | $\alpha_3$             | $\alpha_4$             | $\alpha_5$             | $\varepsilon$ |
|------------|-------------|------------|------------|------------|------------------------|------------------------|------------------------|---------------|
| 179°       | 20          | -0.840     | -0.104     | -0.586     | $1.41 \times 10^{-3}$  | $6.85 \times 10^{-2}$  | $4.65 \times 10^{-2}$  | 0.067         |
| 179°       | 20          | 0.674      | -0.0273    | 0.176      | $-7.75 \times 10^{-4}$ | $-3.78 \times 10^{-2}$ | $-3.58 \times 10^{-2}$ | 0.067         |
| 179°       | 40          | -0.811     | -0.110     | -0.651     | $1.79 \times 10^{-3}$  | $7.16 \times 10^{-2}$  | $4.78 \times 10^{-2}$  | 0.071         |
| 179°       | 40          | 0.665      | -0.0292    | 0.126      | $-7.44 \times 10^{-4}$ | $-3.12 \times 10^{-2}$ | $-3.11 \times 10^{-2}$ | 0.071         |
| 179°       | 60          | -0.684     | -0.122     | -0.533     | $2.87 \times 10^{-3}$  | $4.69 \times 10^{-2}$  | $4.09 \times 10^{-2}$  | 0.063         |
| 179°       | 60          | 0.645      | -0.0153    | 0.138      | $-1.38 \times 10^{-3}$ | $-2.3 \times 10^{-2}$  | $-2.59 \times 10^{-2}$ | 0.063         |
| 179°       | 80          | -0.652     | -0.127     | -0.506     | $3.30 \times 10^{-3}$  | $4.22 \times 10^{-2}$  | $3.93 \times 10^{-2}$  | 0.072         |
| 179°       | 80          | 0.628      | -0.00953   | 0.139      | $-1.67 \times 10^{-3}$ | $-2.15 \times 10^{-2}$ | $-2.49 \times 10^{-2}$ | 0.072         |
| 178.5°     | 20          | -0.910     | -0.201     | -0.702     | $3.59 \times 10^{-3}$  | $8.22 \times 10^{-2}$  | $7.32 \times 10^{-2}$  | 0.062         |
| 178.5°     | 20          | 0.658      | -0.0382    | 0.0756     | $-1.15 \times 10^{-3}$ | $-3.18 \times 10^{-2}$ | $-4.35 \times 10^{-2}$ | 0.062         |
| 178.5°     | 40          | -0.825     | -0.181     | -0.688     | $3.57 \times 10^{-3}$  | $7.05 \times 10^{-2}$  | $5.96 \times 10^{-2}$  | 0.091         |
| 178.5°     | 40          | 0.686      | -0.0443    | 0.0275     | $-1.42 \times 10^{-3}$ | $-2.11 \times 10^{-2}$ | $-3.16 \times 10^{-2}$ | 0.091         |
| 178.5°     | 60          | -0.709     | -0.176     | -0.613     | $4.16 \times 10^{-3}$  | $5.38 \times 10^{-2}$  | $5.02 \times 10^{-2}$  | 0.083         |
| 178.5°     | 60          | 0.659      | -0.0353    | 0.0705     | $-1.75 \times 10^{-3}$ | $-1.98 \times 10^{-2}$ | $-2.69 \times 10^{-2}$ | 0.083         |
| 178.5°     | 80          | -0.685     | -0.178     | -0.597     | $4.44 \times 10^{-3}$  | $5.06 \times 10^{-2}$  | $4.87 \times 10^{-2}$  | 0.063         |
| 178.5°     | 80          | 0.647      | -0.0304    | 0.0731     | $-2.01 \times 10^{-3}$ | $-1.90 \times 10^{-2}$ | $-2.58 \times 10^{-2}$ | 0.063         |

Table S3: Fitting parameters for the “sickle” shape of SS-RBCs obtained from the simulation with

different cell rigidity.  $\theta_0$  represents the spontaneous deflection angle for the AHP domain of the current model.

| $\theta_0$ | $\mu/\mu_0$ | $b_1$ | $b_2$ | $p$  |
|------------|-------------|-------|-------|------|
| 179.0°     | 20          | 7.0   | 2.9   | 1.22 |
| 179.0°     | 40          | 6.55  | 3.03  | 1.29 |
| 179.0°     | 60          | 5.8   | 3.32  | 1.38 |
| 179.0°     | 80          | 5.5   | 3.4   | 1.48 |
| 178.5°     | 20          | 6.2   | 2.95  | 1.37 |
| 178.5°     | 40          | 5.8   | 3.1   | 1.38 |
| 178.5°     | 60          | 5.4   | 3.25  | 1.51 |
| 178.5°     | 80          | 5.3   | 3.35  | 1.54 |

Table S4: Parameters of Eq. (3) for the range of “sickle” shape of SS-RBC on the x-y plane, where the boundary of the cell membrane is defined by the pseudo-elliptical curve.

Similarly, the surfaces of the cell membranes with “holly leaf” are fitted by Eq. (1). Fig. S3 shows the fitted surface of the SS-RBCs with cell membrane shear modulus  $\mu = 40\mu_0$  and  $100\mu_0$ , respectively. In addition, we note that multiple spicules appear on the cell membrane. Correspondingly, the 2D projection of the cell membrane on the x-y plane is represented  $g(x, y) = 0$  defined by

$$g(x, y) = \begin{cases} \left(\frac{x}{a}\right)^p + (-1)^s \left(\frac{y}{b}\right)^p = 1 \\ \left(\frac{x}{c}\right)^q + (-1)^t \left(\frac{y}{d}\right)^q = 1, \end{cases} \quad (\text{S4})$$

where the parameter  $a$ ,  $b$ ,  $c$  and  $d$  defines the length and width of the cell on the 2D projection. Here,  $s$  and  $t$  are chosen as 0 or 1, which determines the hyperbolic ( $s, t = 1$ ) or elliptic properties ( $s, t = 0$ ) of the cell boundary curves;  $p$  and  $q$  define the generalized power for the hyperbolic or elliptical properties. The fitting parameter and  $L_2$  error for the cell membrane are presented in Tab. S5 and Tab. S6.

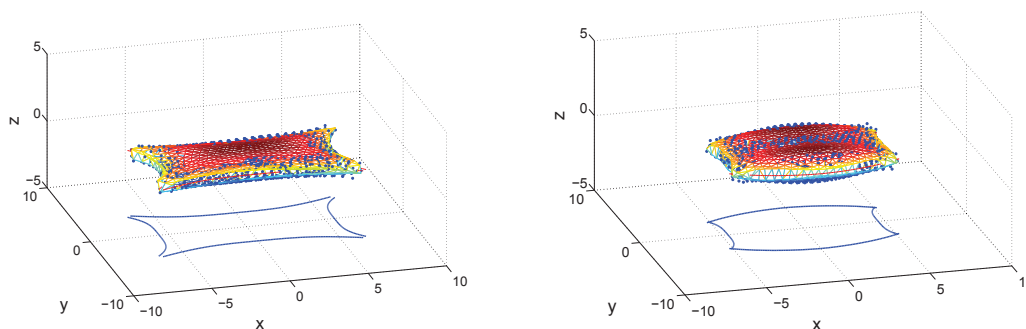

Figure S3: Three-dimensional fitted surface for the simulated SS-RBC of “holly leaf” shape

represented by Eq. (1), where the shear modulus of the cell membrane is  $40\mu_0$  (left) and  $120\mu_0$  (right). The angular width of the AHP domain  $w$  is  $60^\circ$ . The blue curve represents the boundary of the cell membrane on the x-y plane fitted by Eq. (4).

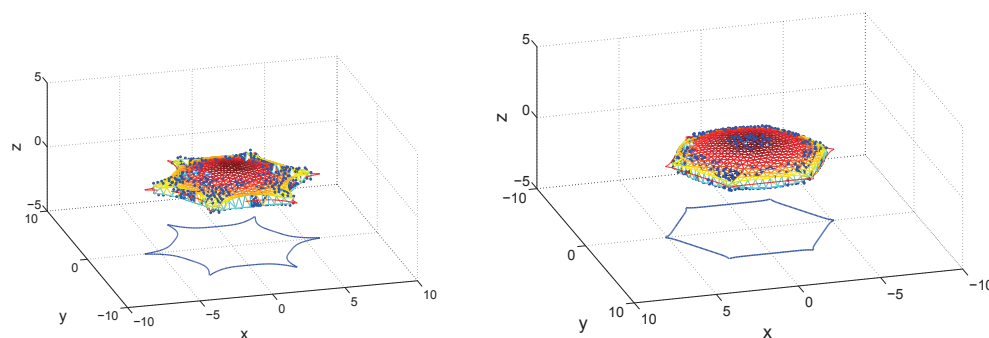

Figure S4: Three-dimensional fitted surface for the simulated SS-RBC of “granular” shape represented by Eq. (1), where the shear modulus of the cell membrane is  $40\mu_0$  (left) and  $2000\mu_0$  (right). The blue curve represents the boundary of the cell membrane on the x-y plane fitted by Eq. (5).

| $\mu/\mu_0$ | $\alpha_0$ | $\alpha_1$             | $\alpha_2$             | $\alpha_3$             | $\alpha_4$             | $\alpha_5$             | $\varepsilon$ |
|-------------|------------|------------------------|------------------------|------------------------|------------------------|------------------------|---------------|
| 30          | -0.957     | $9.30 \times 10^{-3}$  | $5.63 \times 10^{-2}$  | $4.86 \times 10^{-4}$  | $6.70 \times 10^{-3}$  | $-4.49 \times 10^{-3}$ | 0.092         |
| 30          | -0.982     | $-6.32 \times 10^{-3}$ | $6.95 \times 10^{-2}$  | $-6.97 \times 10^{-4}$ | $-8.75 \times 10^{-3}$ | $-5.77 \times 10^{-3}$ | 0.092         |
| 50          | -0.856     | $1.69 \times 10^{-2}$  | $-2.77 \times 10^{-2}$ | $2.42 \times 10^{-4}$  | $8.03 \times 10^{-3}$  | $-1.93 \times 10^{-3}$ | 0.077         |
| 50          | 0.862      | $-1.64 \times 10^{-2}$ | $2.69 \times 10^{-2}$  | $-3.12 \times 10^{-4}$ | $-8.4 \times 10^{-3}$  | $2.12 \times 10^{-3}$  | 0.077         |
| 90          | -0.808     | $1.50 \times 10^{-2}$  | $5.39 \times 10^{-2}$  | $2.53 \times 10^{-4}$  | $6.98 \times 10^{-3}$  | $8.2 \times 10^{-4}$   | 0.073         |
| 90          | -0.826     | $-1.43 \times 10^{-2}$ | $5.71 \times 10^{-2}$  | $-3.67 \times 10^{-4}$ | $-7.59 \times 10^{-3}$ | $-7.12 \times 10^{-4}$ | 0.073         |
| 120         | -0.803     | $1.11 \times 10^{-2}$  | $-6.22 \times 10^{-2}$ | $4.67 \times 10^{-4}$  | $6.80 \times 10^{-3}$  | $2.28 \times 10^{-3}$  | 0.087         |
| 120         | 0.823      | $-1.02 \times 10^{-2}$ | $6.70 \times 10^{-2}$  | $-6.02 \times 10^{-4}$ | $-7.45 \times 10^{-3}$ | $2.28 \times 10^{-3}$  | 0.087         |

Table S5: Fitting parameters for the “holly leaf” shape of SS-RBCs obtained from the simulation with different cell rigidity.

| $\mu/\mu_0$ | $a$ | $b$  | $c$  | $d$ | $s$ | $t$ | $p$ | $q$ |
|-------------|-----|------|------|-----|-----|-----|-----|-----|
| 30          | 5.6 | 3.7  | 4.9  | 2.6 | 1   | 1   | 4.0 | 3.3 |
| 50          | 5.1 | 3.44 | 6.11 | 3.3 | 1   | 0   | 4.0 | 8.0 |
| 90          | 4.8 | 3.17 | 6.8  | 3.7 | 1   | 0   | 4.0 | 2.0 |
| 120         | 4.6 | 3.05 | 7.15 | 3.9 | 1   | 0   | 4.0 | 1.8 |

Table S6: Parameters of Eq. (4) for the range of “holly leaf” shape of SS-RBC on the x-y plane, where the surface of the cell membrane is defined by a combination of pseudo-hyperbolic and pseudo-elliptical curves.

Finally, the membrane surface of the “granular” cell is also fitted by Eq. (1). Fig. S4 shows the fitted surface of the SS-RBCs with cell membrane shear modulus  $\mu = 40\mu_0$  and  $100\mu_0$ , respectively. The 2D projection on the x-y plane is represented by a combination of the pseudo-hyperbolic curves  $g(x, y) = 0$  defined by

$$g(x, y) = \begin{cases} \frac{(-\sin(\phi_1)x + \cos(\phi_1)y)^p}{b^p} - \frac{(\cos(\phi_1)x + \sin(\phi_1)y)^p}{a^p} = 1 \\ \frac{(-\sin(\phi_2)x + \cos(\phi_2)y)^p}{b^p} - \frac{(\cos(\phi_2)x + \sin(\phi_2)y)^p}{a^p} = 1 \\ \frac{(-\sin(\phi_3)x + \cos(\phi_3)y)^p}{b^p} - \frac{(\cos(\phi_3)x + \sin(\phi_3)y)^p}{a^p} = 1, \end{cases} \quad (\text{S5})$$

where  $a$  and  $b$  defines the size of the 2D projection and the  $p$  defines the generalized power of the hyperbolic curves. The fitting parameters of the 3D surface and 2D curve are presented in Tab. S7 and Tab. S8.

| $\mu/\mu_0$ | $\alpha_0$ | $\alpha_1$             | $\alpha_2$             | $\alpha_3$             | $\alpha_4$             | $\alpha_5$             | $\varepsilon$ |
|-------------|------------|------------------------|------------------------|------------------------|------------------------|------------------------|---------------|
| 40          | -1.42      | $9.44 \times 10^{-2}$  | 0.101                  | $1.86 \times 10^{-3}$  | $-2.23 \times 10^{-3}$ | $-3.54 \times 10^{-3}$ | 0.084         |
| 40          | 1.33       | $-9.52 \times 10^{-2}$ | $-8.91 \times 10^{-2}$ | $-1.95 \times 10^{-3}$ | $1.65 \times 10^{-3}$  | $3.45 \times 10^{-3}$  | 0.084         |
| 80          | -1.25      | $6.90 \times 10^{-2}$  | $6.79 \times 10^{-2}$  | $-1.19 \times 10^{-3}$ | $-1.15 \times 10^{-3}$ | $-2.05 \times 10^{-3}$ | 0.097         |
| 80          | 1.21       | $-6.78 \times 10^{-2}$ | $-6.40 \times 10^{-2}$ | $1.09 \times 10^{-3}$  | $1.03 \times 10^{-3}$  | $1.64 \times 10^{-3}$  | 0.097         |
| 160         | -1.13      | $4.23 \times 10^{-2}$  | $4.18 \times 10^{-2}$  | $-1.68 \times 10^{-4}$ | $-9.50 \times 10^{-5}$ | $-1.61 \times 10^{-4}$ | 0.074         |
| 160         | 1.11       | $-4.22 \times 10^{-2}$ | $-3.97 \times 10^{-2}$ | $8.8 \times 10^{-5}$   | $1.10 \times 10^{-6}$  | $-8.74 \times 10^{-5}$ | 0.074         |
| 320         | -1.12      | $3.04 \times 10^{-2}$  | $3.07 \times 10^{-2}$  | $5.07 \times 10^{-4}$  | $5.51 \times 10^{-4}$  | $1.33 \times 10^{-3}$  | 0.071         |
| 320         | 1.08       | $-2.75 \times 10^{-2}$ | $-2.76 \times 10^{-2}$ | $-6.78 \times 10^{-4}$ | $7.29 \times 10^{-4}$  | $1.71 \times 10^{-3}$  | 0.071         |
| 2000        | -1.16      | $3.39 \times 10^{-2}$  | $3.33 \times 10^{-2}$  | $6.08 \times 10^{-4}$  | $6.06 \times 10^{-4}$  | $1.19 \times 10^{-3}$  | 0.089         |
| 2000        | 1.13       | $-3.06 \times 10^{-2}$ | $-3.02 \times 10^{-2}$ | $-8.32 \times 10^{-4}$ | $7.83 \times 10^{-4}$  | $1.66 \times 10^{-3}$  | 0.089         |

Table S7: Fitting parameters for the “granular” shape of SS-RBCs obtained from the simulation with different cell rigidity.

| $\mu/\mu_0$ | $a$ | $b$ | $p$  | $\phi_1$ | $\phi_2$ | $\phi_3$ |
|-------------|-----|-----|------|----------|----------|----------|
| 40          | 2.5 | 3.8 | 2.8  | 0        | $\pi/3$  | $-\pi/3$ |
| 80          | 2.6 | 4.0 | 3.6  | 0        | $\pi/3$  | $-\pi/3$ |
| 160         | 2.7 | 4.2 | 5.5  | 0        | $\pi/3$  | $-\pi/3$ |
| 320         | 2.7 | 4.3 | 6.0  | 0        | $\pi/3$  | $-\pi/3$ |
| 2000        | 2.8 | 4.4 | 10.0 | 0        | $\pi/3$  | $-\pi/3$ |

Table S8: Parameters of Eq. (5) for the range of SS-RBCs with “granular shape” on the x-yplane, where the boundary of the cell membrane is defined by the combination of pseudo-hyperbolic curves.

## References

- [1] Evans, E. A. and Skalak, R. *Mechanics and thermodynamics of biomembranes*. CRC Press, Inc., Boca Raton, Florida, 1980.
